# Supplementary material
Source: MDPI journal article supplement (https://www.mdpi.com/2079-6412/13/12/2094)
Supplement: s1 [file s1]

# Supplementary Materials: Chemisorption and Surface Reaction of Hafnium Precursors on the Hydroxylated Si(100) Surface

Truong Ba Tai <sup>1</sup>, Jonghun Lim <sup>2,\*</sup> and Hyeyoung Shin <sup>1,\*</sup>

<sup>1</sup> Graduate School of Energy Science and Technology (GEST), Chungnam National University, Daejeon 34134, Republic of Korea; taib.truong@gmail.com

<sup>2</sup> Department of Environment and Energy Engineering, Sungshin Women's University, Seoul 01133, Republic of Korea

\* Correspondence: jlim@sungshin.ac.kr (J.L.); shinhy@cnu.ac.kr (H.S.)

**Table S1.** The average bond dissociation energies (BDEs) of the hafnium precursors obtained at PBE0/6-31G(d,p) for C, H, O and def2svp for F, Cl, I and Hf level. The values in brackets are obtained by using aug-cc-pVTZ (for F and Cl) and aug-cc-pVTZ-PP (for Hf and I) basis sets.

| Precursors                         | Average BDEs (kJ/mol) |
|------------------------------------|-----------------------|
| HfI <sub>4</sub>                   | 359 (349)             |
| HfCl <sub>4</sub>                  | 487 (475)             |
| HfF <sub>4</sub>                   | 633 (628)             |
| Hf[OMe] <sub>4</sub>               | 448                   |
| Hf[O <sup>i</sup> Pr] <sub>4</sub> | 451                   |
| Hf[O <sup>i</sup> Bu] <sub>4</sub> | 454                   |

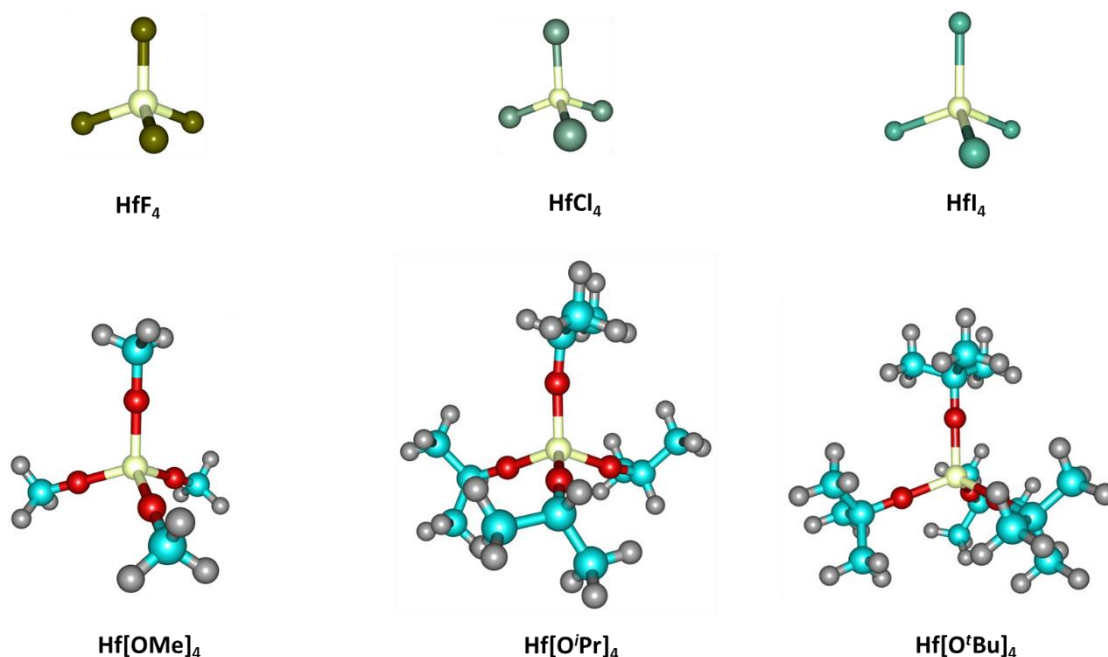

**Figure S1.** The optimized geometries of hafnium halides and hafnium alkoxides.
